# Supplementary material for: Bio-based thermoplastic poly(butylene succinate-co-propylene succinate) copolyesters: effect of glycerol on thermal and mechanical properties
Source: Royal Society of Chemistry journal article supplement (doi:10.1039/c9sm01958h), 2019-01-01
Supplement: c9sm01958h1.pdf [file c9sm01958h1.pdf]

## 1 **SUPPORTING INFORMATION**

2

### 3 **Bio-based Thermoplastic Poly(Butylene Succinate-co-Propylene Succinate)**

#### 4 **Copolyesters: Effect of Glycerol on Thermal and Mechanical Properties**

5

6

7 Kai-Hung Hsu, Chin-Wen Chen,\* Li-Yuan Wang, Hao-Wei Chan, Cyuan-Lun He, Chia-Jung Cho,

8 Syang-Peng Rwei, and Chi-Ching Kuo\*

9

10 Institute of Organic and Polymeric Materials, Research and Development Center of Smart Textile  
11 Technology, National Taipei University of Technology, No. 1, Sec. 3, Chung-Hsiao East Road.,  
12 Taipei, 10608, Taiwan (R.O.C.)

13

14

15

16 \*Author to whom all correspondence should be addressed

17 Tel: 886-2-27712171\*2407 Fax: 886-2-27317174

18

#### 19 **Corresponding author**

20 \*Prof. Dr. C.-C. Kuo: [kuocc@mail.ntut.edu.tw](mailto:kuocc@mail.ntut.edu.tw)

21 \*Dr. C.-W. Chen: [cwchen@ntut.edu.tw](mailto:cwchen@ntut.edu.tw)

22

23

24

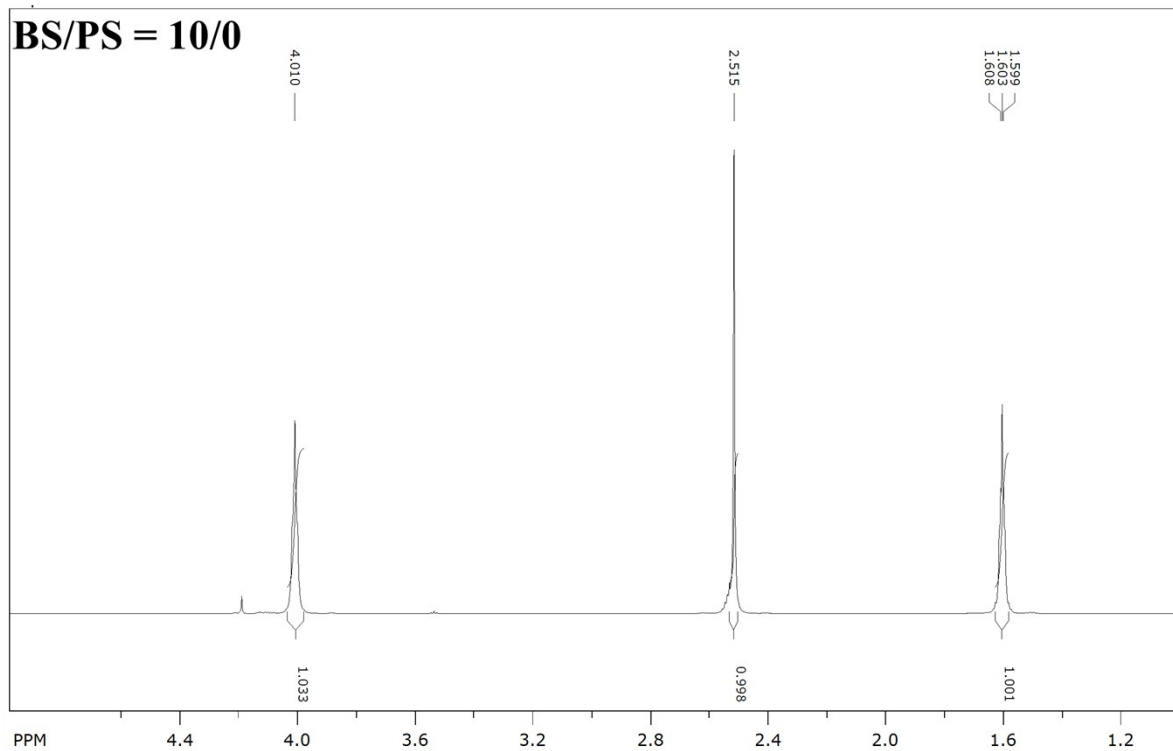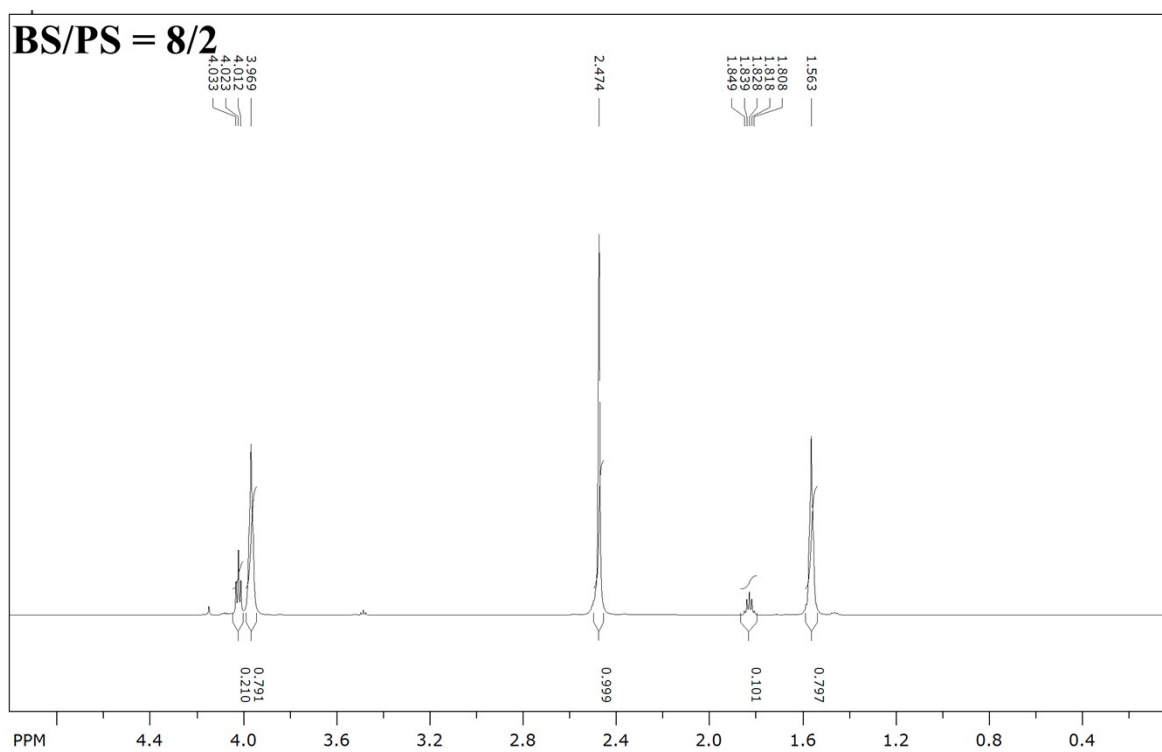

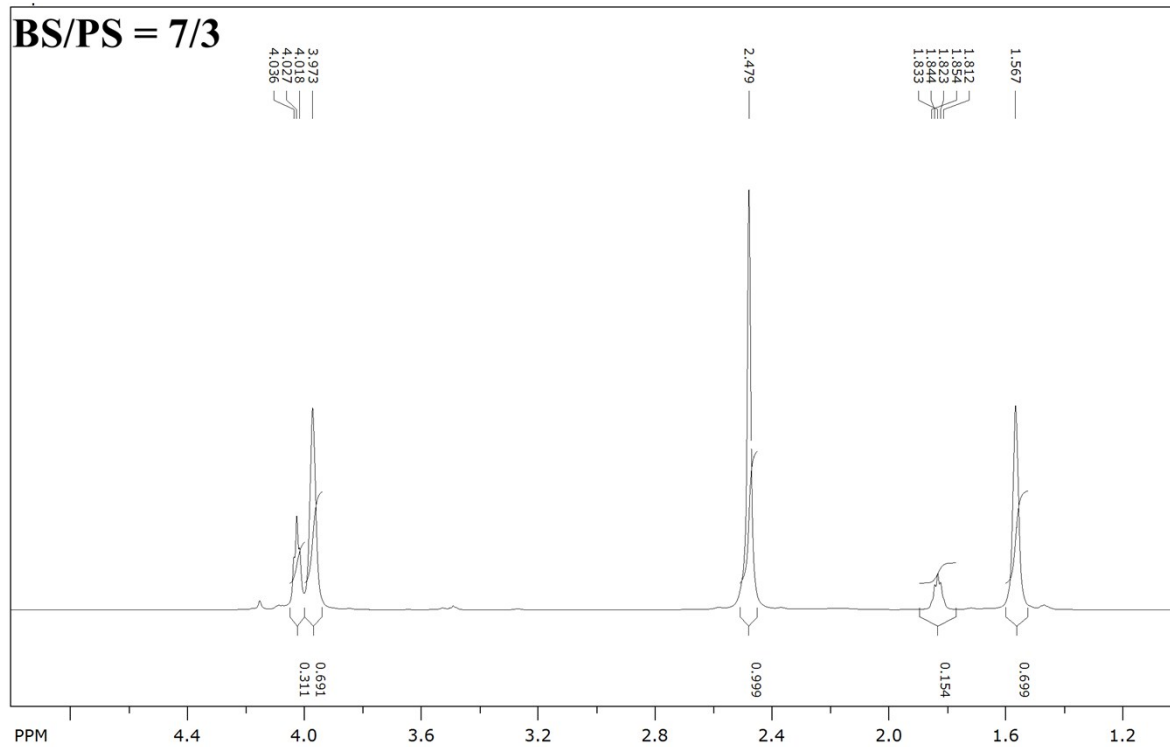

32

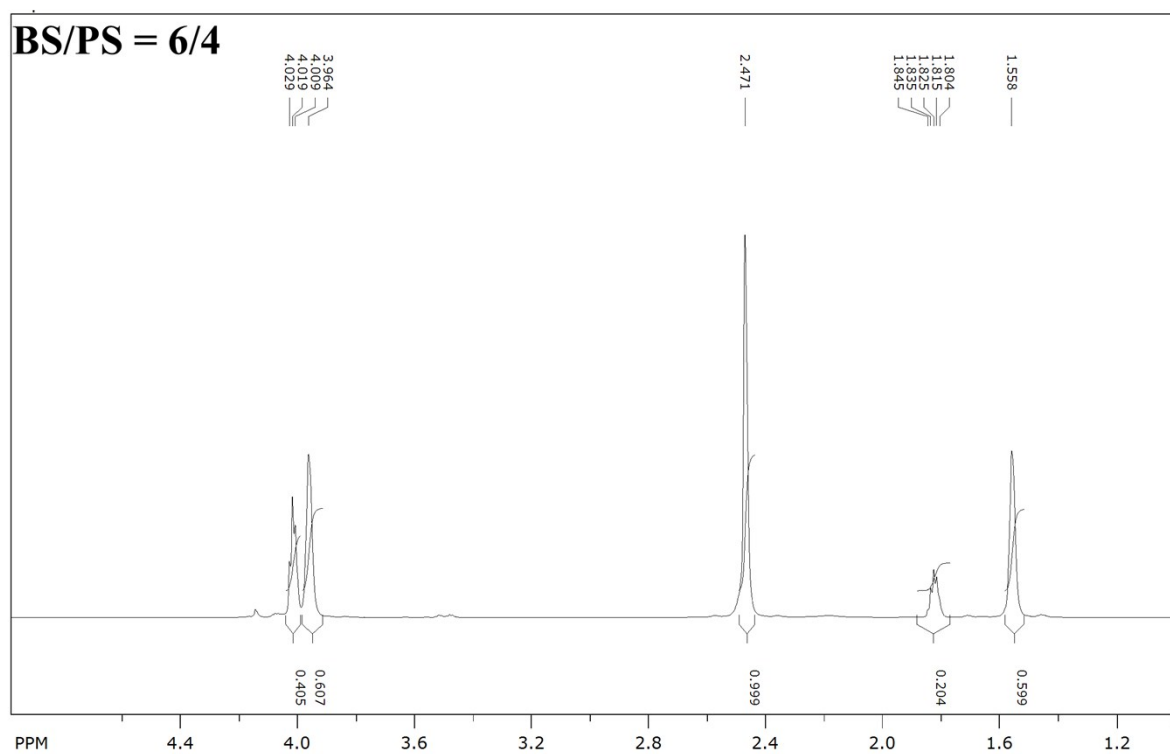

33

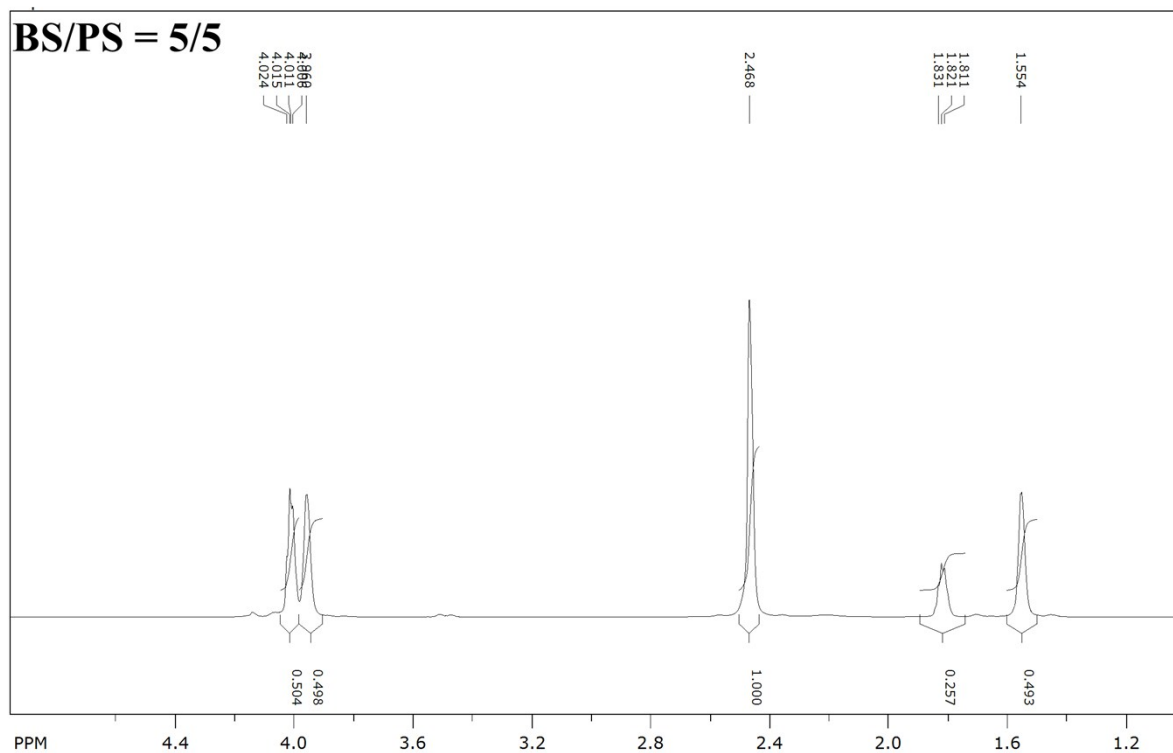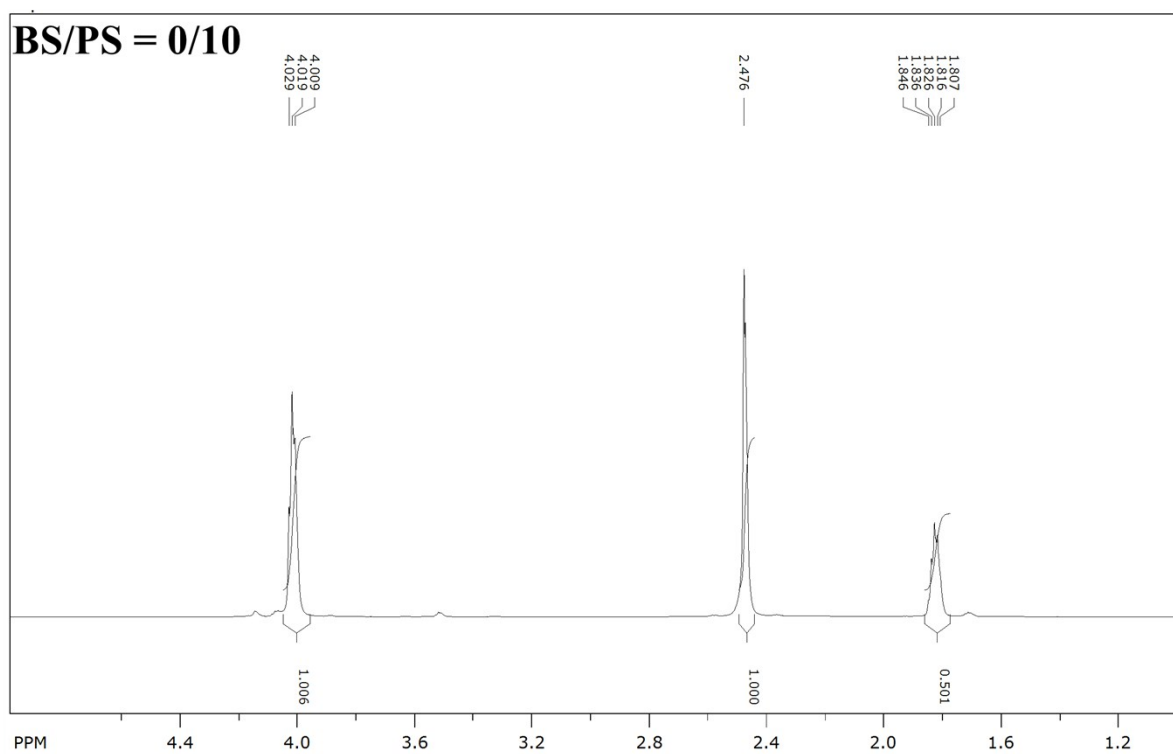

34

35

36 **Fig. S1**  $^1\text{H}$  NMR spectra for the poly(butylene succinate-co-propylene succinate)PBSPS copolyesters

37 at BS/PS = 10/0, 8/2, 7/3, 6/4, 5/5, and 0/10.

38

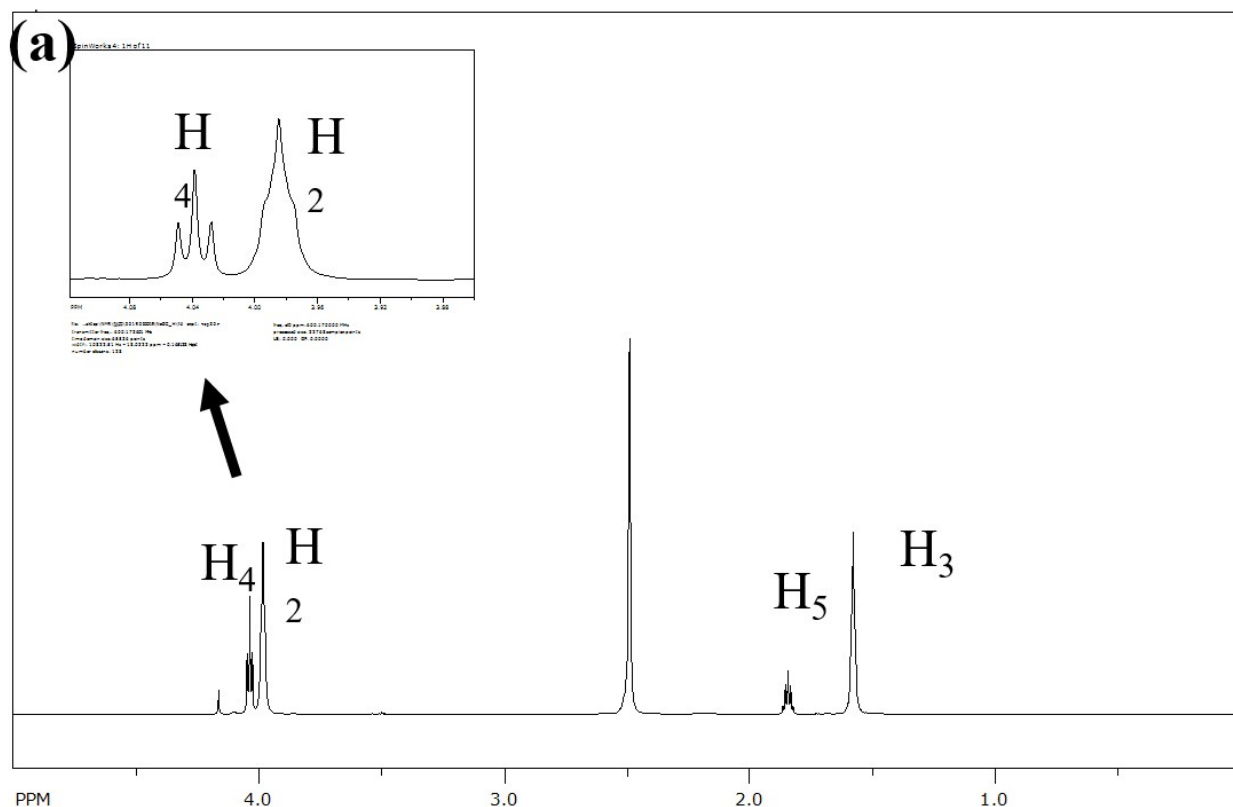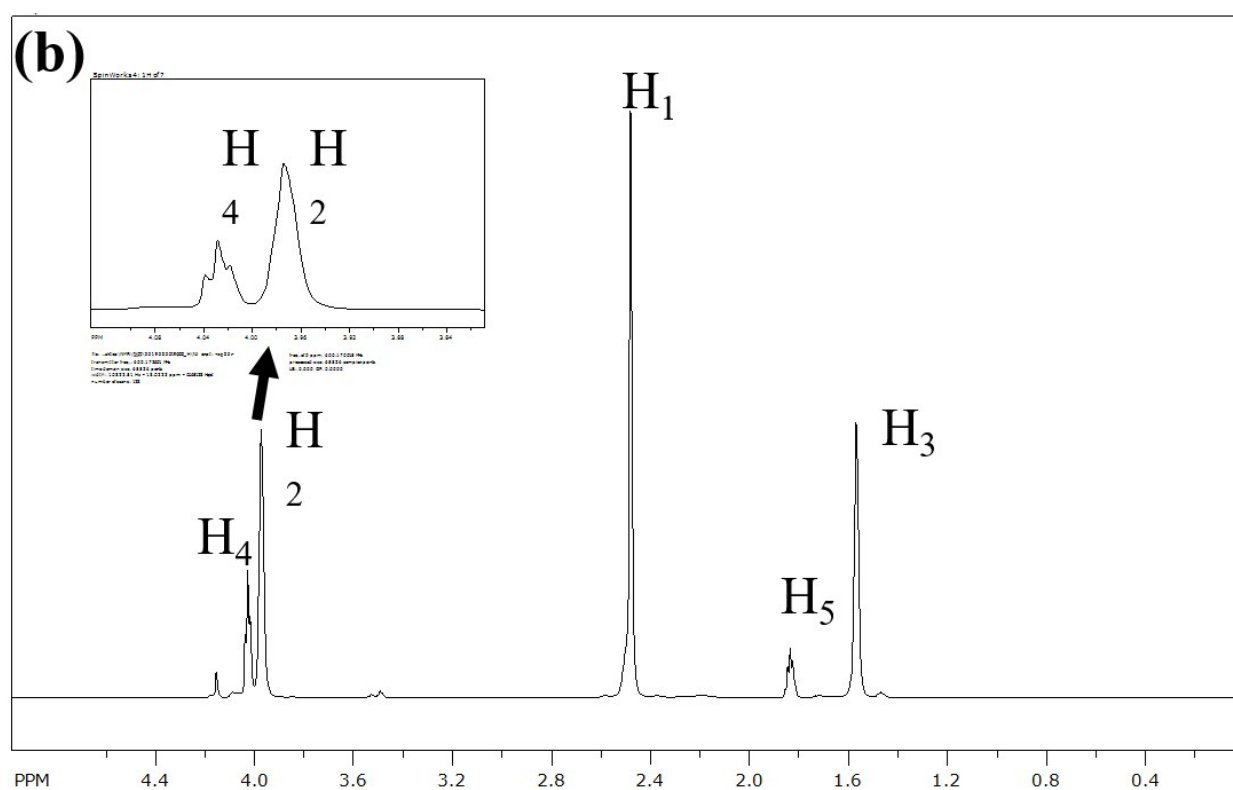

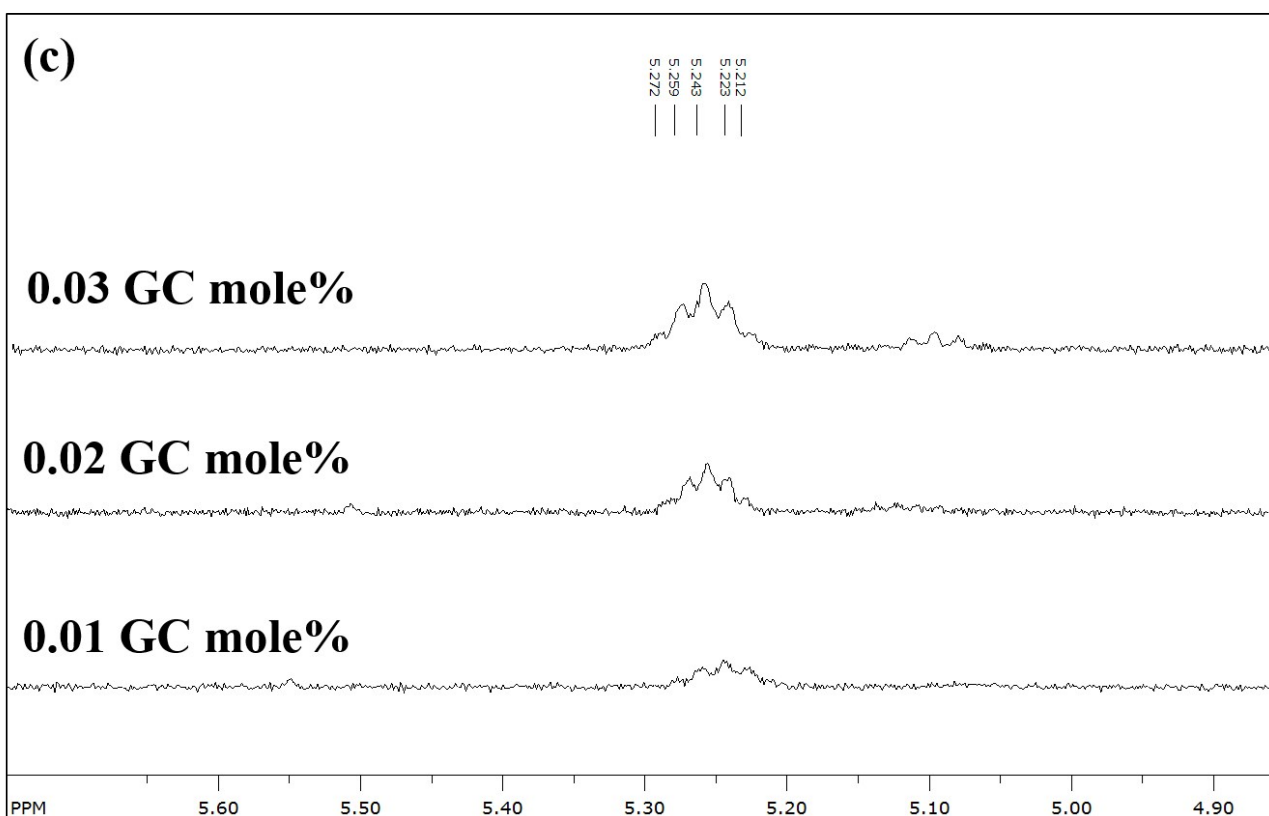

40  
41 **Fig. S2**  $^1\text{H}$  NMR spectra (a) without GC and (b) with GC at 0.02 mol% (c) with GC at 0.01, 0.02,  
42 and 0.03 mol% for the poly(butylene succinate-co-propylene succinate) PBSPS copolyesters at a  
43 BS/PS ratio of 7/3.

44

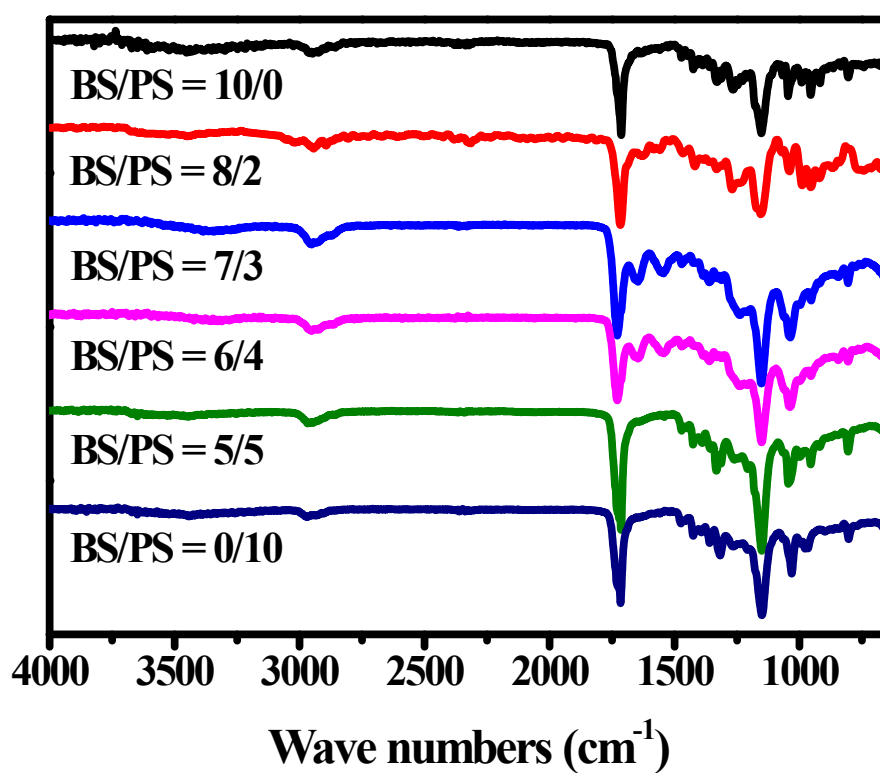

45  
 46 **Fig. S3** FTIR spectra of the poly(butylene succinate-co-propylene succinate) PBSPS copolyesters  
 47 with different BS/PS ratios with 0.02 mole% GC.

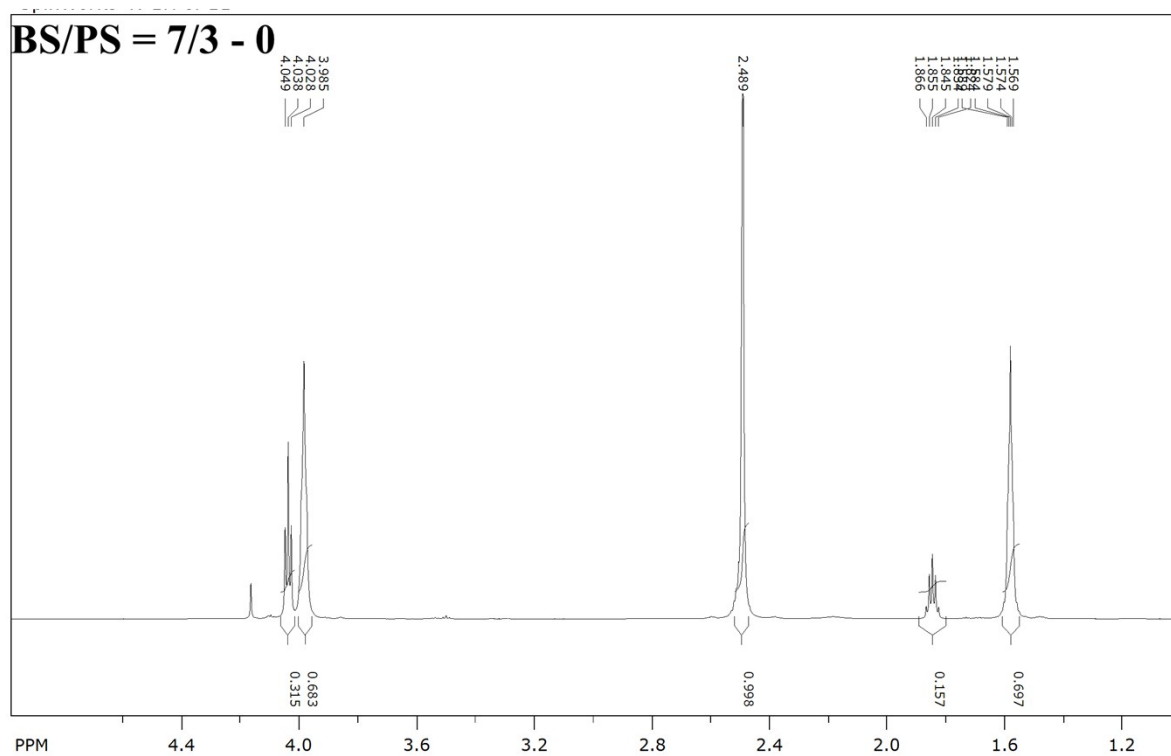

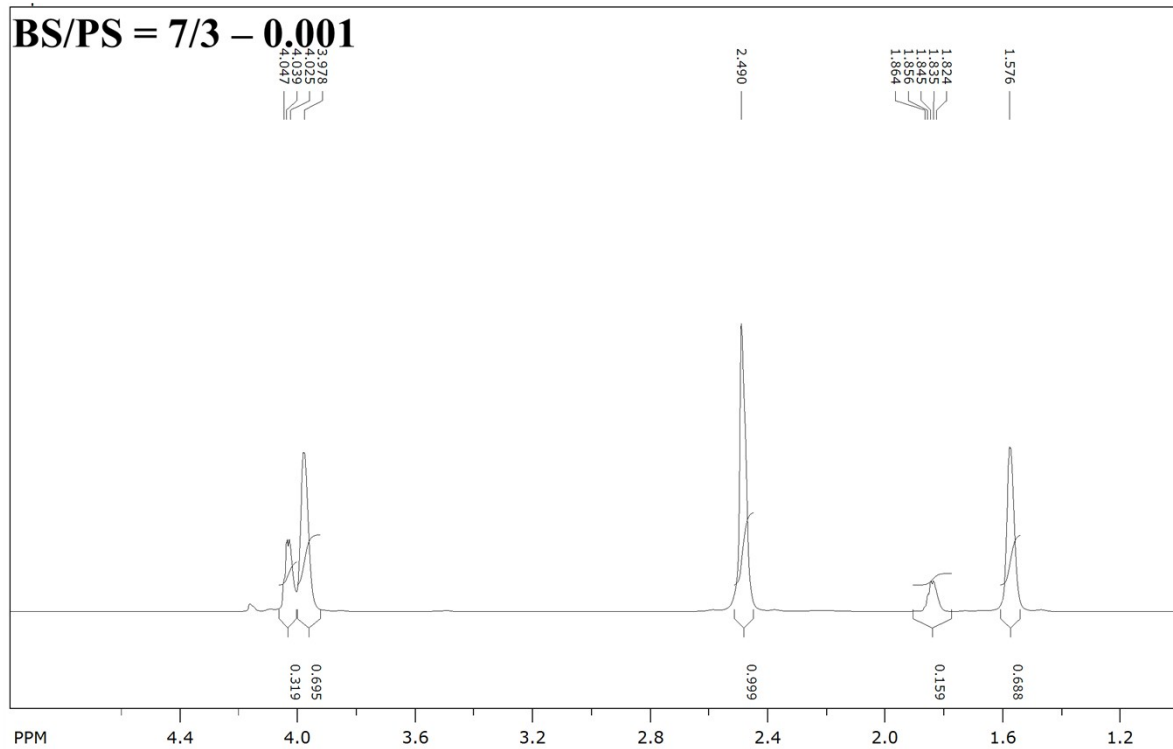

49

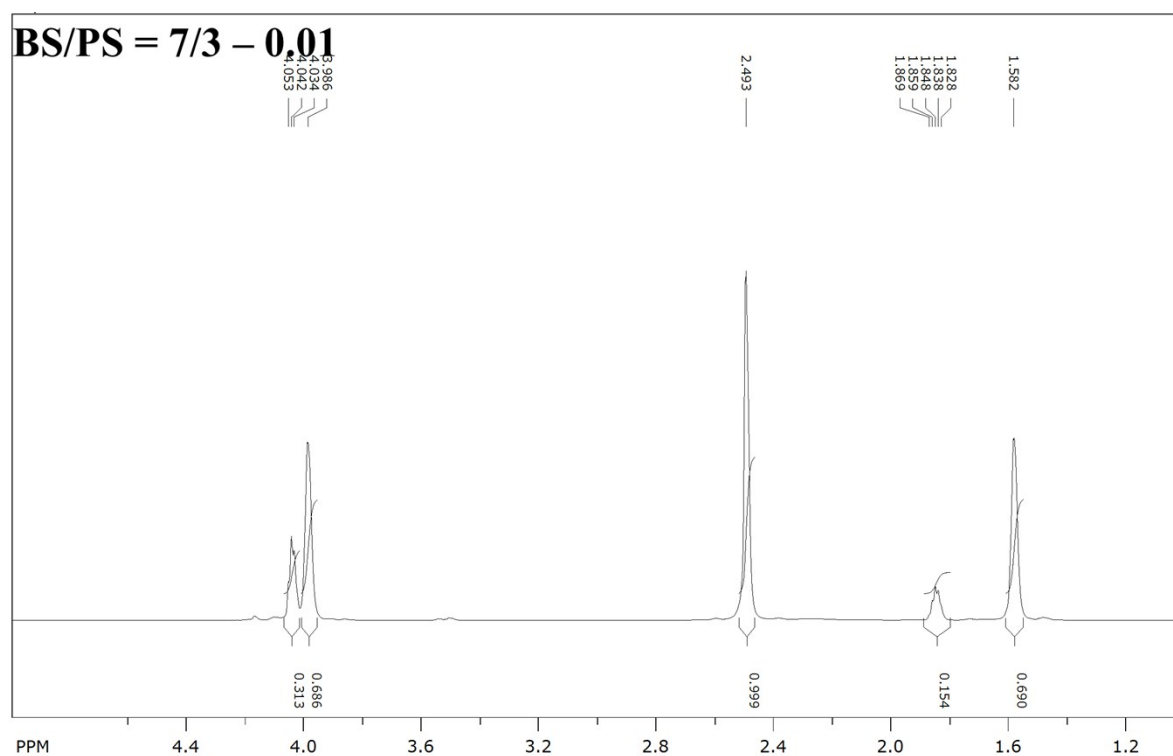

50



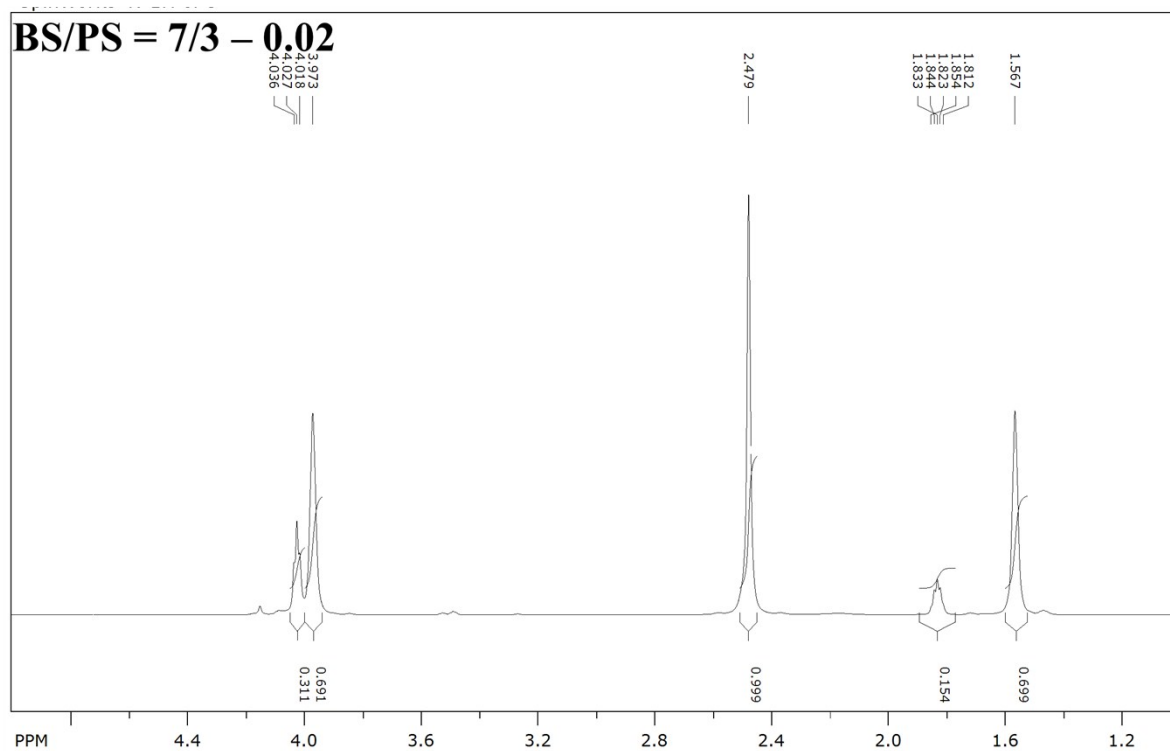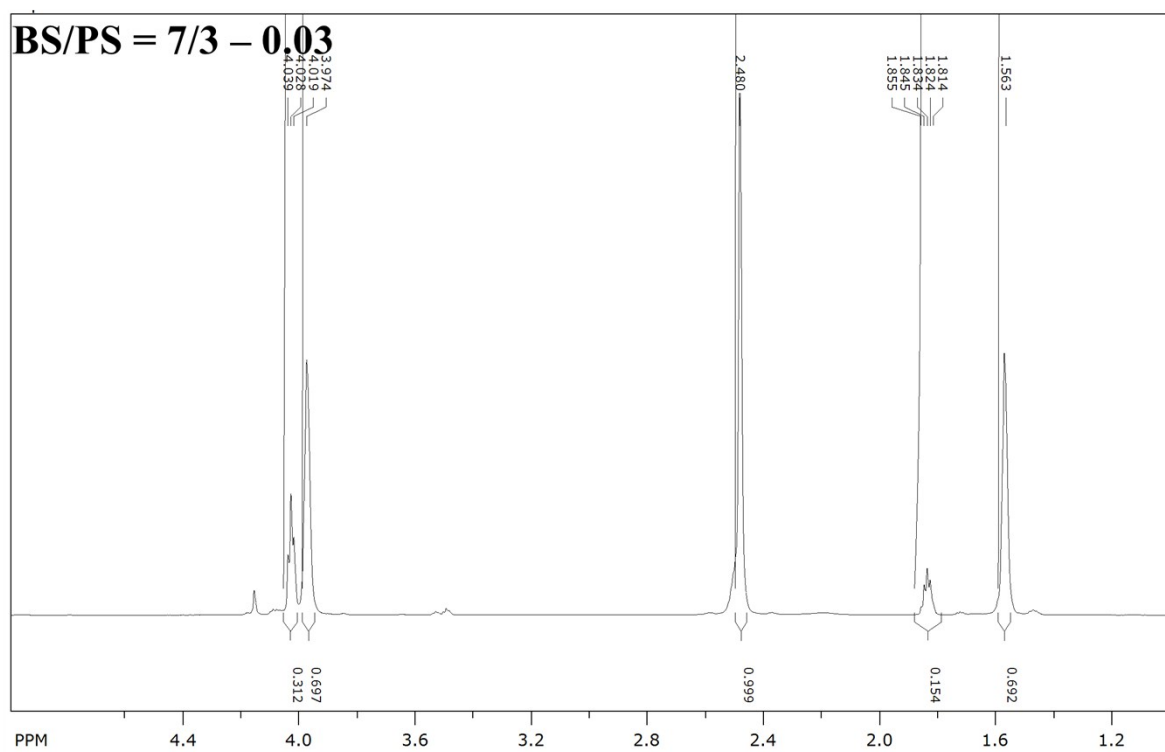

51

52

53 **Fig. S4**  $^1\text{H}$  NMR spectra for the poly(butylene succinate-co-propylene succinate) copolyesters with  
 54 BS/PS = 7/3 and glycerol contents 0, 0.001, 0.01, 0.02, and 0.03 mol%

55

56

57

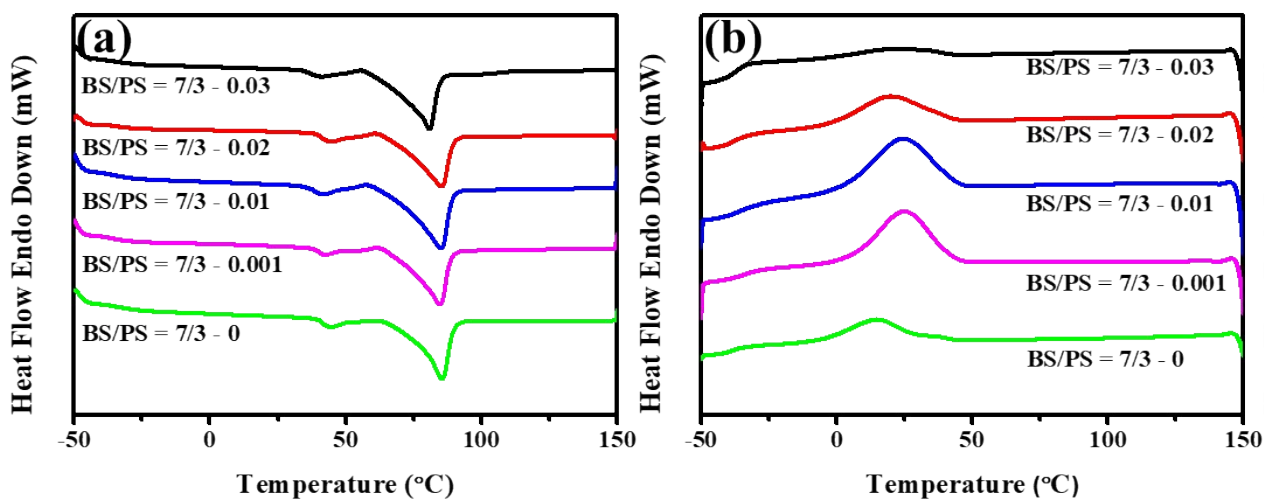

58

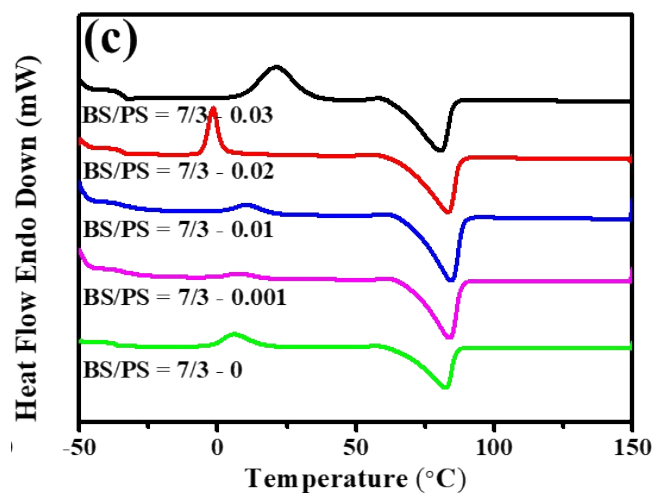

59

60 **Fig. S5** DSC traces of the poly(butylene succinate-co-propylene succinate)PBSPS copolyesters at  
 61 fixed BS/PS = 7/3 with various GC content at a heating rate of 10 °C/min: (a) heating curves in the  
 62 first cycle, (b) cooling curves in the first cycle, and (c) heating curves in the second cycle.

63

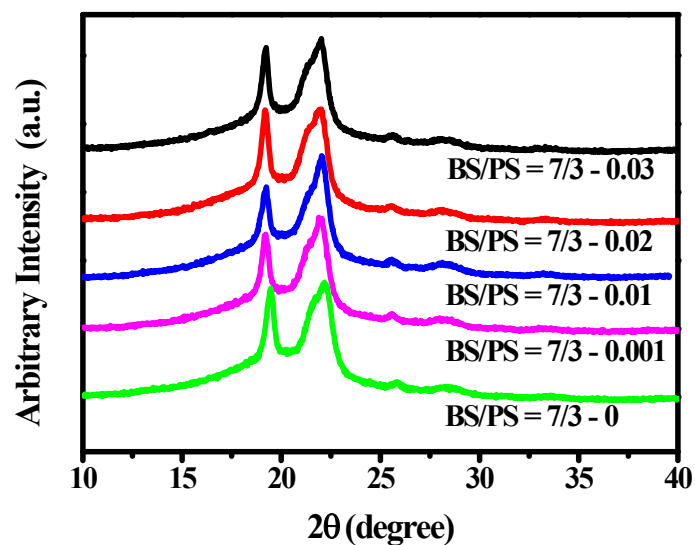

64  
 65 **Fig. S6.** WAXD patterns of the poly(butylene succinate-co-propylene succinate) PBSPS  
 66 copolyesters at fixed BS/PS = 7/3 with different GC contents.

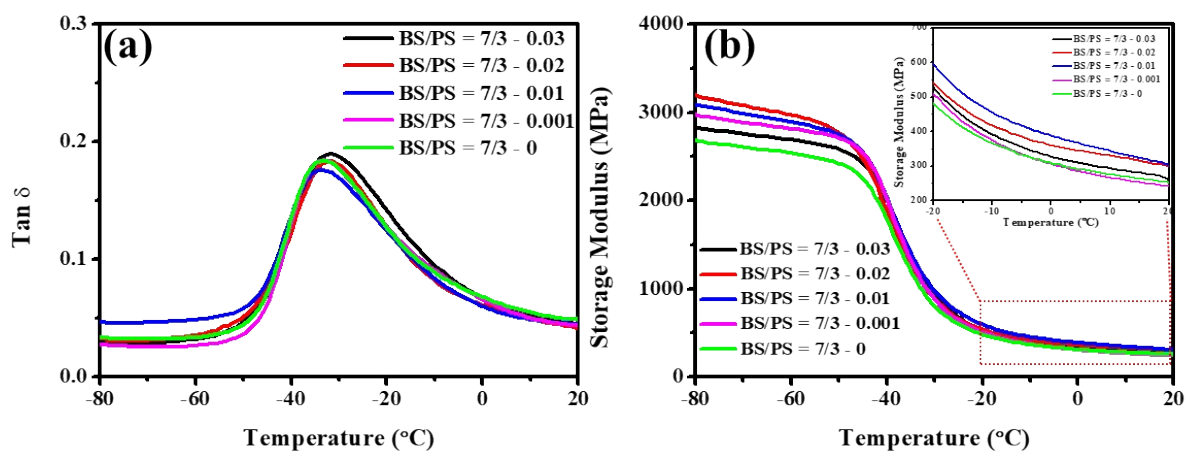

68  
 69 **Fig. S7** (a) Tan  $\delta$  curves and (b) storage moduli of copolyesters at fixed BS/PS = 7/3 with different  
 70 GC content at a heating rate of 5 °C/min and a frequency of 1 Hz.

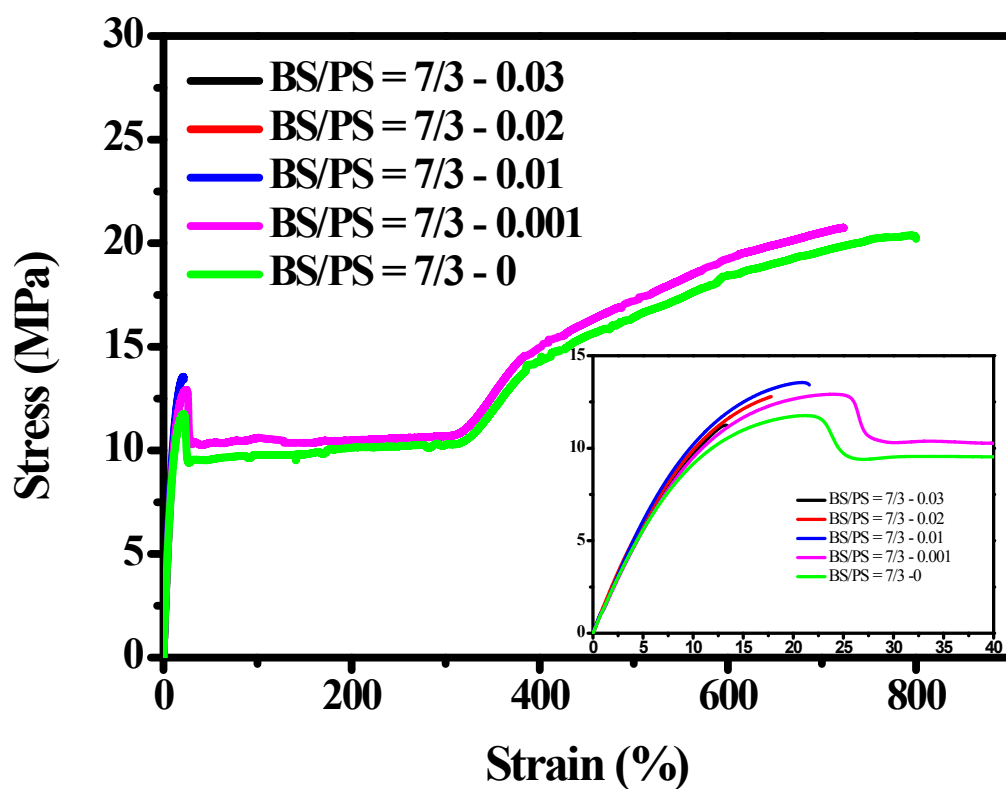

72  
 73 **Fig. S8** Stress-strain curves of copolyesters at fixed BS/PS = 7/3 with different GC contents at a  
 74 testing speed of 50 mm/min.

87 copolyesters; chemical shifts of H<sub>1</sub> to H<sub>5</sub> (ppm) and their integral ratios (value in brackets) of <sup>1</sup>H

88 NMR spectra for PBSPS copolyesters with 0.02 mole% GC.

| <b>Item</b>  | <b>Feed</b>  | <b>Calculated</b> | <b>H<sub>1</sub></b> | <b>H<sub>2</sub></b> | <b>H<sub>3</sub></b> | <b>H<sub>4</sub></b> | <b>H<sub>5</sub></b> | <b>H<sub>7</sub></b> |
|--------------|--------------|-------------------|----------------------|----------------------|----------------------|----------------------|----------------------|----------------------|
| <b>BS/PS</b> | <b>ratio</b> | <b>ratio</b>      | <b>(ppm)</b>         | <b>(ppm)</b>         | <b>(ppm)</b>         | <b>(ppm)</b>         | <b>(ppm)</b>         | <b>(ppm)</b>         |
| 10/0         | 100          | 100               | 2.515<br>(1.000)     | 4.010<br>(1.003)     | 1.603<br>(1.001)     |                      |                      |                      |
| 8/2          | 80           | 79.7              | 2.474<br>(1.000)     | 3.969<br>(0.791)     | 1.563<br>(0.797)     | 4.023<br>(0.210)     | 1.828<br>(0.101)     | 5.245<br>(0.006)     |
| 7/3          | 70           | 69.9              | 2.479<br>(1.000)     | 3.973<br>(0.691)     | 1.567<br>(0.699)     | 4.027<br>(0.311)     | 1.823<br>(0.154)     | 5.244<br>(0.006)     |
| 6/4          | 60           | 59.9              | 2.471<br>(1.000)     | 3.964<br>(0.607)     | 1.558<br>(0.599)     | 4.019<br>(0.405)     | 1.825<br>(0.599)     | 5.246<br>(0.006)     |
| 5/5          | 50           | 49.3              | 2.468<br>(1.000)     | 3.968<br>(0.498)     | 1.554<br>(0.493)     | 4.015<br>(0.493)     | 1.821<br>(0.257)     | 5.245<br>(0.006)     |
| 0/10         | 0            | 0                 | 2.476<br>(1.000)     |                      |                      | 4.019<br>(1.006)     | 1.826<br>(0.501)     | 5.246<br>(0.006)     |

89

90

91 **Table S2** Molar fractions, probabilities of triad sequences, randomness factors ( $B$ ), and average  
 92 sequence lengths ( $Ln_{BS}$  and  $Ln_{PS}$ ) at a fixed ratio of BS/PS = 7/3 with different GC contents.

| BS/PS = 7/3<br>GC mole% | Normalized peak areas of<br>carbonyl carbons (%) |       |           |      | Triad sequence<br>probabilities (%) |        |        |
|-------------------------|--------------------------------------------------|-------|-----------|------|-------------------------------------|--------|--------|
|                         | BSB                                              | BSP-B | BSP-<br>P | PSP  | P(BSB)                              | P(BSP) | P(PSP) |
|                         |                                                  |       |           |      |                                     |        |        |
| GC = 0.03               | 45.9                                             | 19.2  | 16.8      | 18.1 | 45.9                                | 36.0   | 18.1   |
| GC = 0.02               | 46.3                                             | 17.4  | 19.9      | 16.4 | 46.3                                | 37.3   | 16.4   |
| GC = 0.01               | 43.8                                             | 22.2  | 18.0      | 16.0 | 43.8                                | 40.2   | 16.0   |
| GC = 0.001              | 44.7                                             | 20.0  | 20.6      | 14.7 | 44.7                                | 40.6   | 14.7   |
| GC = 0                  | 44.5                                             | 22.7  | 19.3      | 13.5 | 44.5                                | 42.0   | 13.5   |

  

| BS/PS 7/3<br>GC mole% | <sup>1</sup> H NMR |       |         | <sup>13</sup> C NMR |       |      |                  |                  |
|-----------------------|--------------------|-------|---------|---------------------|-------|------|------------------|------------------|
|                       | BS(%)              | PS(%) | GC(%)   | BS(                 | PS(%) | B    | Ln <sub>BS</sub> | Ln <sub>PS</sub> |
|                       |                    |       |         | %)                  |       |      |                  |                  |
| GC = 0.03             | 69.2               | 30.8  | 0.002   | 63.9                | 36.1  | 0.78 | 3.55             | 2.01             |
| GC = 0.02             | 69.9               | 30.1  | 0.0015  | 64.9                | 35.1  | 0.82 | 3.48             | 1.88             |
| GC = 0.01             | 69.0               | 31.0  | 0.00125 | 63.9                | 36.1  | 0.87 | 3.18             | 1.79             |
| GC = 0.001            | 69.8               | 30.2  | *       | 65.0                | 35.0  | 0.89 | 3.20             | 1.62             |
| GC = 0                | 69.7               | 30.2  | --      | 65.5                | 34.5  | 0.93 | 3.11             | 1.64             |

93 \*GC can not be observed in <sup>1</sup>H NMR.

94

95

96
